# Supplementary material for: The alternate-day fasting diet is a more effective approach than a calorie restriction diet on weight loss and hs-CRP levels
Source: Atypon-hosted journal article supplement (doi:10.1024/0300-9831/a000623), 2020-01-31
Supplement: 0300-9831_a000623_esm1.pdf [file 0300-9831_a000623_esm1.pdf]

**Table E1.** the weekly schedule of dietary following

|            | <b>Saturday</b>        | <b>Sunday</b>          | <b>Monday</b>          | <b>Tuesday</b>         | <b>Wednesday</b>       | <b>Thursday</b>        | <b>Friday</b>          |
|------------|------------------------|------------------------|------------------------|------------------------|------------------------|------------------------|------------------------|
| <b>ADF</b> | Fasting<br>(400-600)   | Ad libitum             | Fasting<br>(400-600)   | Ad libitum             | Fasting<br>(400-600)   | Ad libitum             | Ad libitum             |
| <b>CR</b>  | 75% energy<br>provided |

All feed and fast days began at midnight each day. Abbreviations: ADF: Alternate Day Fasting;  
CR: Calorie restriction

<https://doi.org/10.1024/0300-9831/a000623>
